# Supplementary figures and images for: Dynamics and Diversity of Intrauterine Anaerobic Microbiota in Dairy Cows with Clinical and Subclinical Endometritis
Source: MDPI journal article supplement (doi:10.3390/ani13010082), 2022-12-26

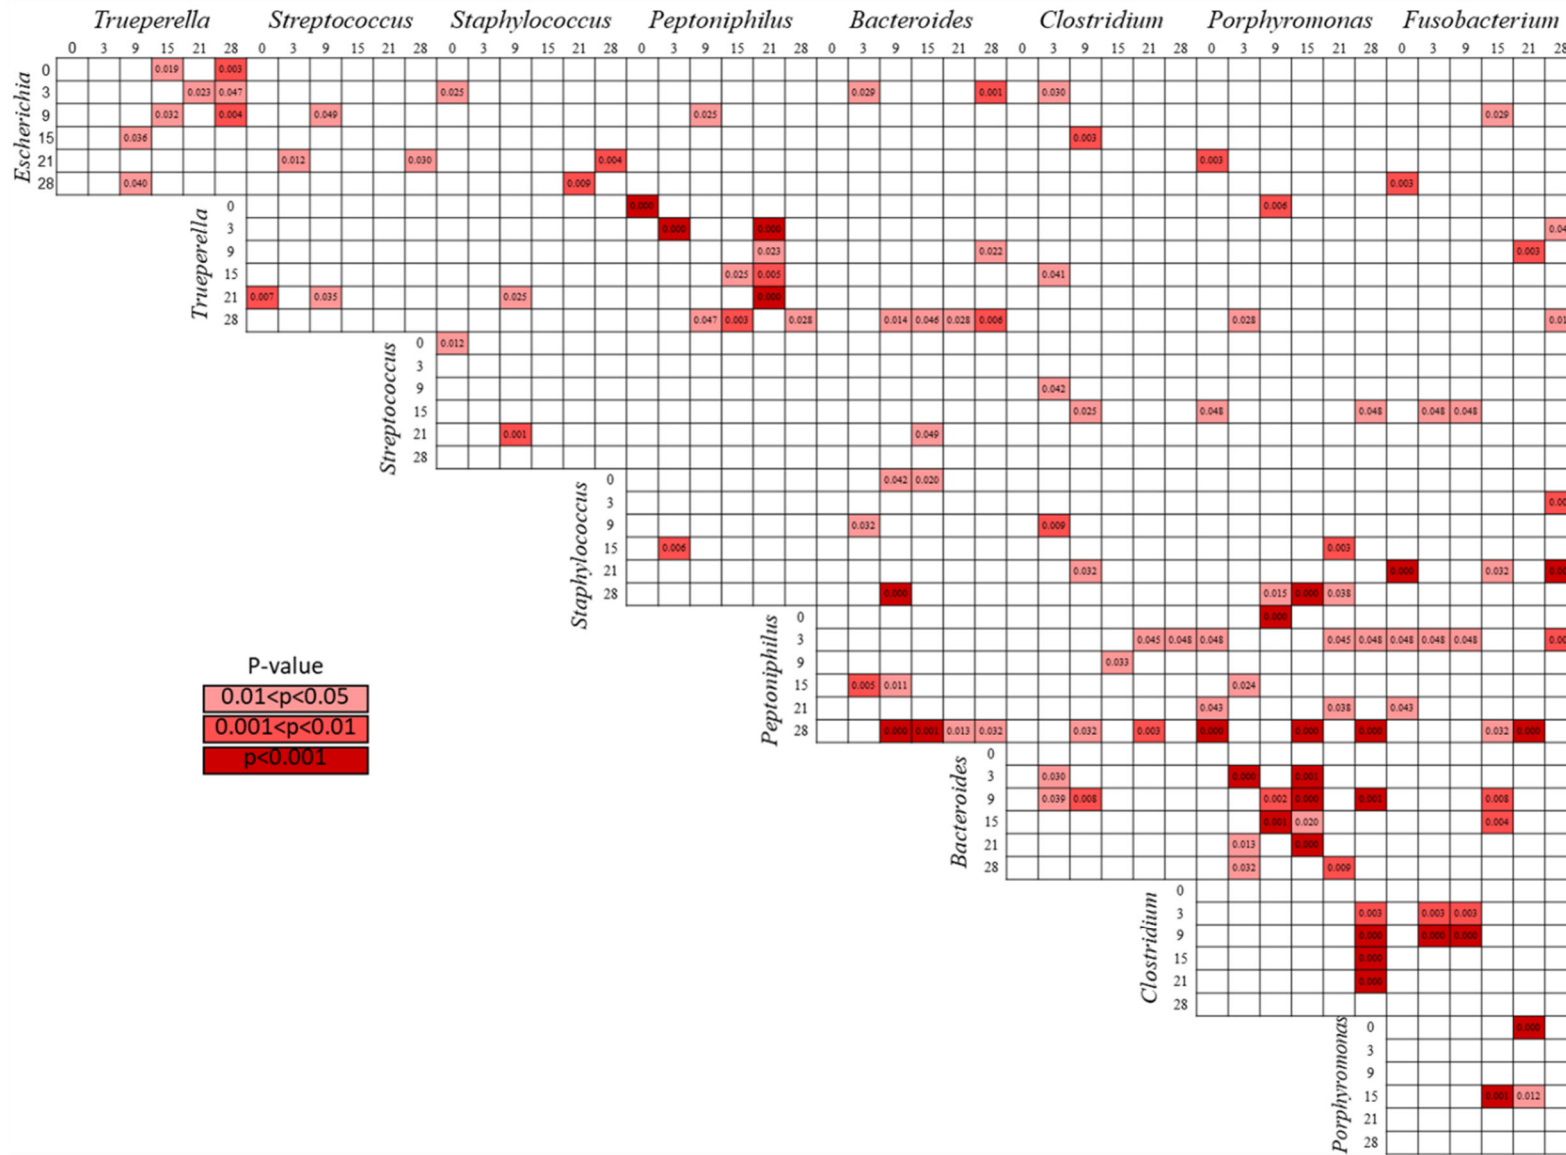

Supplement: s1 [file s1]
